# Supplementary material for: Duodenal-Jejunal Bypass Ameliorates Type 2 Diabetes Mellitus by Activating Insulin Signaling and Improving Glucose Utilization in the Brain
Source: Springer Nature journal article supplement (doi:10.1007/s11695-019-04153-3), 2019-10-11
Supplement: MOESM3 [file 17264738]

| Supplemental Table 2. Primer sequences of InsR, IRS1, IRS2, PI3K, GLUT1, GLUT3, HK1, PFK2, Insulin and β-actin | |
| --- | --- |
| Gene Name | Sequence(5’ to 3’) |
| InsR | F-GTC ATC TCT GGC CTG AGA CAC TT |
|  | R-AGC CAC GCT GCA CCT CTC T |
| IRS1 | F-GTT TCC AGA AGC AGC CAG AG |
|  | R-ACT CTC TCC ACC CAA CGT GA |
| IRS2 | F-CAG CTG TCT TCC TGC TTC CA |
|  | R-GGA CCG CTA GGA TGT GTA GC |
| PI3K | F- AGA TCG CTC TGG CCT CAT TG |
|  | R- AGC CAG TTC AGA AGG GCA TC |
| GLUT1 | F-CAA TCA AAC ATG GAA CCA CCG |
|  | R-CGA TTG ATG AGC AGG AAG CG |
| GLUT3 | F-GAG TCA TCA ATG CGC CTG AG |
|  | R-AGC TCC TCA GAG CCC AGA AT |
| HK1 | F-GCT ACA TGG AGG AAC TGC GAC AC |
|  | R-GTA CAT GCC GCT CAC CAT CTT CTC |
| PFK2 | F-TGG CTA CCG TGG ACC TG AGA |
|  | R-CCC TGA CAG CAG CAT TCA TAC CT |
| Insulin | F-ATT GTT CCA ACA TGG CCC TGT |
|  | R-TTG CAG TAG TTC TCC AGT T |
| β-actin | F-AGA TTA CTG CCC TGG CTC CTA G |
|  | R-GAC TCA TCG TAC TCC TGC TTG C |
